# Supplementary material for: On the Limits of Köhler Activation Theory: How do Collision andCoalescence Affect the Activation of Aerosols?
Source: Copernicus journal article supplement (doi:10.5194/acp-2017-134), 2017-02-15
Supplement: Supplementary file [file acp-2017-134-RC2-supplement.zip]

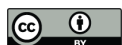

# On the Limits of Köhler Activation Theory: How do Collision and Coalescence Affect the Activation of Aerosols?

Fabian Hoffmann

Institute of Meteorology and Climatology, Leibniz Universität Hannover, Hannover, Germany.

Correspondence to: F. Hoffmann (hoffmann@muk.uni-hannover.de)

**Abstract.** Activation is necessary to form a cloud droplet from an aerosol, and it occurs as soon as a wetted aerosol grows beyond its critical radius. Traditional Köhler theory assumes that this growth is driven by the diffusion of water vapor. However, if the wetted aerosols are large enough, the coalescence of two or more particles is an additional process for accumulating sufficient water for activation. This transition from diffusional to collectional growth marks the limit of traditional Köhler theory and it is studied using a Lagrangian cloud model in which aerosols and cloud droplets are represented by individually simulated particles within large-eddy simulations of shallow cumuli. It is shown that the activation of aerosols larger than  $0.1\ \mu\text{m}$  in dry radius can be affected by collision and coalescence, and its contribution increases with a power-law relation toward larger radii and becomes the only process for the activation of aerosols larger than  $0.4 - 0.8\ \mu\text{m}$  depending on aerosol concentration. Due to the natural scarcity of the affected aerosols, the amount of aerosols that are activated by collection is small with a maximum of 1 in 10000 activations. The fraction increases as the aerosol concentration increases, but decreases again as the number of aerosols becomes too high and the particles too small to cause collections. Moreover, activation by collection is found to affect primarily aerosols that have been entrained above the cloud base.

## 1 Introduction

Activation is necessary for the formation of droplets from aerosols. Accordingly, activation controls the number and size of cloud droplets and hence so-called aerosol-cloud interactions, e.g., cloud albedo (Twomey, 1974) or cloud lifetime (Albrecht, 1989). In contrast to cloud droplets, which behave like bulk water, the understanding of unactivated aerosols and their activation depends fundamentally on the aerosol's physicochemical properties, which cause the so-called solute and curvature effects (Köhler, 1936). These effects enable, on the one hand, the stable existence of haze particles (also termed wetted aerosols) in subsaturated environments and inhibit, on the other hand, diffusional growth if the supersaturation does not exceed a certain threshold. This so-called critical supersaturation is associated with a critical radius, to which a wetted aerosol must grow to be considered as activated. Small aerosols activate almost immediately when the supersaturation exceeds the critical supersaturation, as it is assumed in many parameterizations of the activation process (e.g., Twomey, 1959). For larger aerosols, however, the critical radius becomes so large that the time needed for activation can be substantially increased (or even prevented under certain conditions) due to the kinetically limited transport of water vapor to the particle's surface (Chuang et al., 1997). Therefore, Köhler activation theory is usually considered a weak concept for these particles. But where are the limits of Köhler

# Summary of Comments on 170412.reviewed.acp-2017-134.pdf

---

Page: 1

---

 Author: reviewer    Date: 2017/04/14 0:08:10

1. Major request.

This is not true for "collectional activation". Modify it appropriately.



activation theory located? An upper limit of the applicability of Köhler activation theory can be identified by the switch from predominantly diffusional to collectional (collision followed by coalescence) mass growth if the involved particles become large enough. Indeed, inactivated aerosols triggering collisions is closely related to the impact of giant and ultra-giant aerosols (dry radius  $> 1 \mu\text{m}$ ) on clouds, which are able to initiate precipitation due to their large wet radii ( $> 20 \mu\text{m}$ ) (e.g., Johnson, 1982). Recent studies indicate that collection might even affect smaller particles: by considering the effects of turbulence, the collection kernel for the interaction of small particles can be significantly increased (e.g., Devenish et al., 2012). Accordingly, the main questions of this study are: Where are the limits of traditional Köhler theory? At which aerosol size will collection dominate the activation process? And how much does collectional activation contribute to the activation of aerosols? To answer these questions, theoretical arguments and large-eddy simulations (LES) with particle-based cloud physics are applied. Particle-based cloud physics, so-called Lagrangian cloud models (LCMs), are especially suitable for this study because they explicitly resolve the activation process and do not rely on a parameterization of it (e.g., Andrejczuk et al., 2008; Hoffmann et al., 2015; Hoffmann, 2016). Therefore, the results will give insights on the physical processes usually not covered (or missed) by those activation parameterizations typically implemented in other cloud models.

This paper is designed as follows. The subsequent Section 2 will illuminate how collections can cause (or even inhibit) activation by simple theoretical arguments. In Section 3, the LES-LCM simulation setup is introduced. Results will be presented in the Sections 4 and 5, where the former section exemplifies the applied methodology used to untangle diffusional from collectional activation and the latter section presents the results from a shallow cumulus test case. The study is summarized and discussed in Section 6. Appendix A introduces the governing equations of the applied LCM and necessary extensions carried out for this study.

## 2 Theoretical considerations

In this section, the general effects of coalescence on the activation of aerosols will be addressed. To simplify the argumentation in this part of the study, it is assumed that collections take place regardless of the physics that enable or inhibit them in reality.

We consider one particle which grows by coalescing with other particles. Accordingly, the particle's water mass after  $n$  collections is given by

$$m_n = m_0 + \sum_{i=1}^n m_i = m_0 + n \cdot \langle m \rangle, \quad (1)$$

where  $m_0$  terms the particle's initial water mass and  $m_i$  ( $i > 0$ ) the mass of water added by each collection. The second equals sign introduces the assumption of a monodisperse ensemble of collected particles.

Based on Köhler theory, it can be shown that the critical radius for activation is given by

$$r_{\text{crit}} = \sqrt{3 \frac{b \cdot m_s}{A}}, \quad (2)$$

where  $m_s$  is the dry aerosol mass. Curvature effects are considered by  $A = 2\sigma/(\rho_l R_v T)$ , depending on the surface tension of water  $\sigma$ , mass density of water  $\rho_l$ , specific gas constant of water vapor  $R_v$ , and temperature  $T$ . The physicochemical aerosol

 Author: reviewer    Date: 2017/04/14 14:38:41

---

2. Major request.

The discussion here is interesting and helpful to understand "collectional activation". However,  $r > r_{crit}$  is not a rigorous criterion for "collectional activation". Consider how to revise or justify the analysis.

 Author: reviewer    Date: 2017/04/14 0:08:46

---

3. Minor request.

To avoid confusion, you should explicitly mention that condensation/evaporation process is ignored in the theoretical analysis in this section.

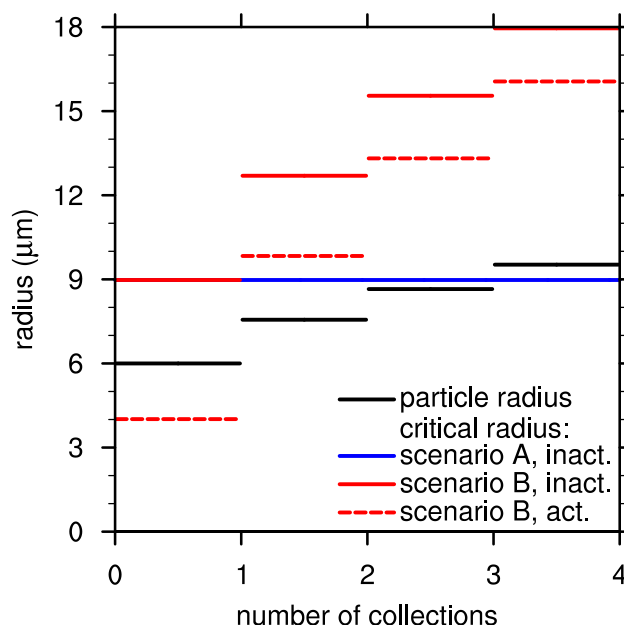

**Figure 1.** Change of particle radius (black line) and critical radius (colored lines) as a function of the number of collections for the growth scenarios A (negligible increase of aerosol mass, blue line) and B (aerosol mass increases proportional to the number of collections, red lines) as well as initially inactivated (continuous lines) and activated particles (dashed line). The initial wet particle radius and the wet radii of the collected particles are assumed to be  $6\mu\text{m}$ . The initial dry aerosol mass (sodium chloride) is  $2.2 \times 10^{-16}\text{ kg}$  ( $0.29\mu\text{m}$  dry radius) (continuous lines) and  $4.4 \times 10^{-17}\text{ kg}$  ( $0.17\mu\text{m}$  dry radius) (dashed line). For scenario B, the collected particles contain  $2.2 \times 10^{-16}\text{ kg}$  dry aerosol mass ( $0.29\mu\text{m}$  dry radius).

properties responsible for the solute effect are represented by  $b = 3\nu_s\rho_s\mu_1/(4\pi\rho_l\mu_s)$ , with the van't Hoff factor  $\nu_s$ , the mass density of the aerosol  $\rho_s$ , and the molecular masses of water  $\mu_1$  and aerosol  $\mu_s$ , respectively. Accordingly, the critical mass for activation after  $n$  collections yields

$$m_{\text{crit},n} = \frac{4}{3}\pi\rho_l \cdot r_{\text{crit},n}^3 = \frac{4}{3}\pi\rho_l \cdot \left[ 3\frac{b}{A} \cdot \left( m_{s,0} + \sum_{i=1}^n m_{s,i} \right) \right]^{3/2}, \quad (3)$$

where  $m_{s,0}$  terms the initial aerosol mass and  $m_{s,i}$  ( $i > 0$ ) the aerosol mass added by each collection. Approximating the summation in (3) demands further assumptions on the distribution of aerosol mass within the particle spectrum. Two scenarios are defined. Scenario A: the collected particles contain a negligible amount of aerosols. Accordingly, the aerosol mass does not change ( $\sum_{i=1}^n m_{s,i} = 0$ ). Scenario B: each particle contains the same mass of aerosol. Correspondingly, the aerosol mass increases proportionally to the number of collections ( $\sum_{i=1}^n m_{s,i} = n \cdot \langle m_s \rangle$ ).

In Fig. 1, the evolving particle radius and critical radius are displayed as a function of the number of collections (details on the particle properties are given in the figure's caption). The simultaneous examination of particle radius and critical radius reveals if a particle is activated (particle radius larger than critical radius) or deactivated (particle radius smaller than critical

This page contains no comments



radius). For scenario A, the initially inactivated particle (black line) grows faster than the critical radius (blue line), and the aerosol activates after 3 collections. For scenario B, an initially inactivated particle (continuous red line) and an initially activated particle (dashed red line) are examined. Since the critical radius for activation increases faster than the particle radius, activation is inhibited or the deactivation of previously activated particle is caused.

These considerations suggest that only the collection of particles with a large amount of water and a comparably small amount of aerosol mass (i.e., highly dilute solution droplets) might lead to activation (as shown in scenario A). This, however, indicates that the collected particles are probably activated already. Therefore, the process of collectional activation will not increase the total number of activated aerosols since one or more already activated aerosols need to be collected (or annihilated) in the process of collectional activation. By contrast, the collection of particles with a comparably large amount of aerosol (i.e., less dilute solutions, as shown in scenario B) might inhibit activation since the increase of the critical radius exceeds the increase of the wet radius.

The following part of the study is investigating how coalescence is able to cause aerosol activation in shallow cumulus clouds using a detailed cloud model considering diffusional growth as well as detailed physics of collision and coalescence.

### 3 Simulation setup

The following results are derived from LES simulations applying an LCM for representing cloud microphysics. The LCM is based on a recently developed approach which simulates individual particles that represent an ensemble of identical particles and maintains, as an inherent part of this approach, the identity of droplets and their aerosols throughout the simulation (Andrejczuk et al., 2008; Shima et al., 2009; Sölch and Kärcher, 2010; Riechermann et al., 2012; Naumann and Seifert, 2015). A summary of the governing equations and the extensions carried out for this study to treat aerosol mass change during collision and coalescence is given in the Appendix A. The underlying dynamics model, the LES model PALM (Maronga et al., 2015), solves the non-hydrostatic incompressible Boussinesq-approximated Navier-Stokes equations, and prognostic equations for water vapor mixing ratio, potential temperature, and subgrid-scale turbulence kinetic energy. For scalars, a monotonic advection scheme (Chlond, 1994) is applied to avoid spurious oscillations at the cloud edge (e.g., Grabowski and Smolarkiewicz, 1990).

The initial profiles and other forcings of the simulation follow the shallow trade wind cumuli intercomparison case by Siebesma et al. (2003), which itself is based on the measurement campaign BOMEX (Holland and Rasmusson, 1973). A cyclic model domain of  $3.2 \times 3.2 \times 3.2 \text{ km}^3$  is simulated. (In comparison to Siebesma et al. (2003), the horizontal extent has been halved in each direction due to limited computational resources.) The grid spacing is 20 m isotropically. Depending on the prescribed aerosol concentration, a constant time step of  $\Delta t = 0.2 - 0.5 \text{ s}$  had to be used for the correct representation of condensation and evaporation, but it is also applied to all other processes. The first 1.5 hours of simulated time are regarded as model spin-up; only the following four hours are analyzed.

The simulated particles, called super-droplets following the terminology of Shima et al. (2009), are released at the beginning of the simulation, and are randomly distributed within the model domain up to a height of 2800 m. The average distance between

 Author: reviewer    Date: 2017/04/14 0:09:00

4. Minor suggestion

To avoid confusion, you should clearly mention that those two red lines represent the critical radii, not the particle radius.

 Author: reviewer    Date: 2017/04/14 14:39:36

5. Major question

Isn't this too big for calculating collision coalescence? Maybe it is okay for your method but have you checked the sensitivity to  $dt$ ?



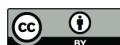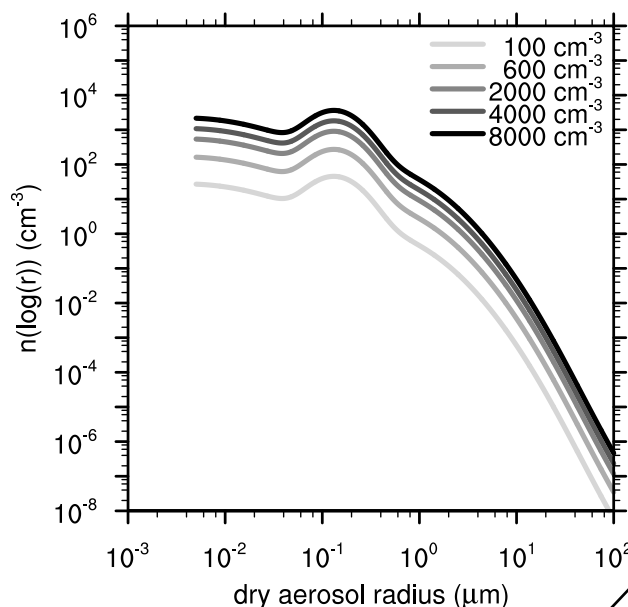

**Figure 2.** The number density distribution of dry aerosol radii for different aerosol concentrations (line brightness).

the super-droplets is 4.3m, yielding a total number of about  $360 \times 10^6$  simulated particles and about 100 super-droplets per grid box. Initial weighting factors, i.e., the number of real particles represented by each super-droplet, are  $8 \times 10^9$ ,  $48 \times 10^9$ ,  $160 \times 10^9$ ,  $320 \times 10^9$ , and  $640 \times 10^9$ , representing aerosol concentrations of 100, 600, 2000, 4000, and  $8000 \text{ cm}^{-3}$ , respectively. These result in average droplet concentrations of 48, 220, 550, 750, and  $1000 \text{ cm}^{-3}$ , respectively.

The dry aerosol radius is assigned to each super-droplet using a random generator which obeys a typical maritime aerosol distribution represented by the sum of three lognormal distributions (Jaenicke, 1993) (Fig. 2). However, only aerosols larger than  $0.005 \mu\text{m}$  are initialized since smaller aerosols do not activate in the current setup. The different aerosol concentrations are created by scaling the weighting factor of each simulated particle to attain the desired concentration. The aerosols are assumed to consist of sodium chloride (NaCl, mass density  $\rho_s = 2165 \text{ kg m}^{-3}$ , van't Hoff factor  $\nu_s = 2$ , molecular weight  $\mu_s = 58.44 \text{ g mol}^{-1}$ ). The initial wet radius of each super-droplet is set to its approximate equilibrium radius depending on aerosol mass and ambient supersaturation (Eq. (14) in Khvorostyanov and Curry, 2007). The applied collection kernel includes effects of turbulence, which have been shown to increase the collection probability of small particles significantly (e.g., Devenish et al., 2012). See Appendix A for more details.

## 4 Methodology

In this section, the applied methodology for untangling the contributions of diffusion and collection to the activation of aerosols is introduced. An aerosol becomes activated when it grows beyond its critical radius ( $r > r_{\text{crit}}$ ). This process can be driven by the diffusion of water vapor or by accumulating liquid water due to collection or by a combination of both. To enable unhindered

 Author: reviewer    Date: 2017/04/14 0:09:18

---

6. Major request

Please make it clear how you decide the initial dry aerosol radius. Uniform random sampling in  $\log(\text{dry}_r)$  space? or any other?

 Author: reviewer    Date: 2017/04/14 0:09:34

---

7. Major request

Not true for "collectional activation"

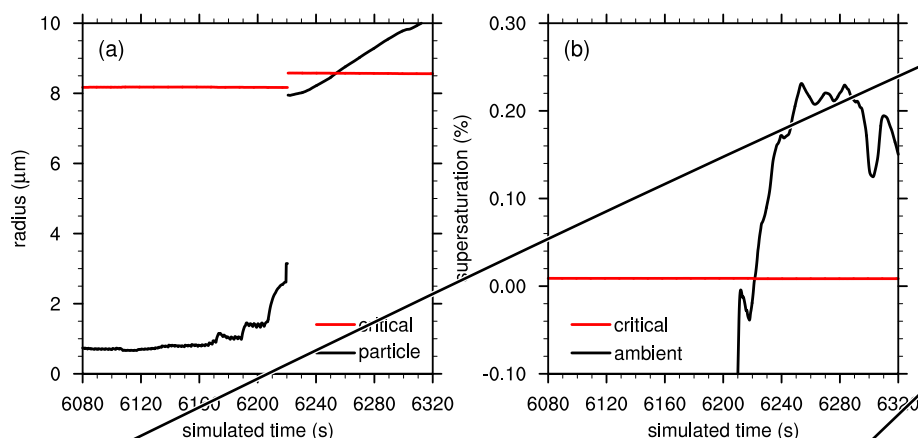

**Figure 3.** Time series of a particle which is activated by collection. Panel (a) shows its radius (black) and critical radius (red) and panel (b) depicts the ambient supersaturation experienced by that particle (black) and its critical supersaturation (red).

119 diffusional growth after activation, the activated particle is required to be located in a volume of air which exceeds the critical  
 120 supersaturation at the moment of activation ( $S > S_{\text{crit}}$  at  $r = r_{\text{crit}}$ ). This is always fulfilled in the case of diffusional growth, but  
 121 it is checked additionally in the case of collectional activation to ensure equivalence of collectional and diffusional activation.

122 To decide if an activation is primarily driven by diffusion or collection, all simulated particles have been tracked throughout  
 123 the simulation and their mass growth has been integrated from their minimum mass before activation,  $\min(m)$ , to the critical  
 124 activation mass,  $m_{\text{crit}}$ :

$$125 \quad \Delta m|_{\text{diff}} = \int_{\min(m)}^{m_{\text{crit}}} dm|_{\text{diff}}, \quad (4)$$

$$126 \quad \Delta m|_{\text{coll}} = \int_{\min(m)}^{m_{\text{crit}}} dm|_{\text{coll}}, \quad (5)$$

127 where  $dm|_{\text{diff}}$  and  $dm|_{\text{coll}}$  are directly derived from the LCM's model equations (A2) and (A5) – (A6), respectively. Note the  
 128 following procedures for determining  $\min(m)$ ,  $\Delta m|_{\text{diff}}$ , and  $\Delta m|_{\text{coll}}$  during the simulation: (i) If a particle shrinks below  
 129  $\min(m)$  before activation,  $\Delta m|_{\text{diff}}$  and  $\Delta m|_{\text{coll}}$  are set to zero and are re-calculated starting from this new minimum mass.  
 130 (ii) If a particle becomes deactivated, i.e., evaporates smaller than its critical radius after being activated, the current mass is  
 131 considered the new  $\min(m)$  and  $\Delta m|_{\text{diff}}$  and  $\Delta m|_{\text{coll}}$  are set to zero. (iii) If a collection does not result in an activation and  
 132 the particle evaporates back to its equilibrium radius afterwards,  $\Delta m|_{\text{diff}}$  will be negative and  $\Delta m|_{\text{coll}}$  positive. To avoid the  
 133 potentially incorrect classification of a following activation,  $\Delta m|_{\text{diff}}$  and  $\Delta m|_{\text{coll}}$  are set to zero if  $\Delta m|_{\text{diff}}$  becomes negative  
 134 and the current mass is considered as  $\min(m)$ .

135 The following two processes are considered a collectional activation if the collectional mass growth exceeds the diffusional  
 136 ( $dm|_{\text{coll}} > dm|_{\text{diff}}$ ): first, the coalescence of two inactivated aerosols resulting directly or after some diffusional growth in an

 Author: reviewer Date: 2017/04/14 0:09:44

8. Major request.

Not true for "collectional activation". They can grow even when  $0 < S < S_{crit}$  if  $r > r_s$ .

 Author: reviewer Date: 2017/04/14 15:05:54

9. Major question and suggestion.

In my point of view, the definition of the collectional activation employed here is too complicated and unnatural.

Is it really necessary to include

inact + inact  $\rightarrow$  inact  $\rightarrow$  act

inact + act  $\rightarrow$  inact  $\rightarrow$  act

inact + act  $\rightarrow$  act (exclude scavenging)

as collectional activation?

Aren't these very rare events that can be negligible?

Further, I think collectional deactivation should be also interesting.

This is just an idea, but in my opinion, it is better to separate the instantaneous activation/deactivation analysis and history analysis, to clarify the structure of the paper.

It sounds natural to me to define the activation/deactivation categories using only instantaneous information:

-----  
diffusional activation

inact  $\rightarrow$  act

diffusional deactivation

act  $\rightarrow$  inact

collectional activation:

inact + inact  $\rightarrow$  act (only direct one)

collectional deactivation:

inact + act  $\rightarrow$  inact

act + act  $\rightarrow$  inact  
-----

For the first step, analyzing the instantaneous activation/deactivation characteristics, should be sufficient.

Then, in the next step, you can carry out history analysis, and indeed it is interesting and important,

However, doing both at once complicate the discussion.

Please consider my proposal.

 Author: reviewer Date: 2017/04/14 0:10:10

10. Typo

d  $\rightarrow$  Delta

 Author: reviewer Date: 2017/04/14 0:10:18

11. Typo

 Author: reviewer Date: 2017/04/14 0:10:27

12. Minor request.

This is ambiguous. Do you mean when it will be activated by diffusion without further coalescence?

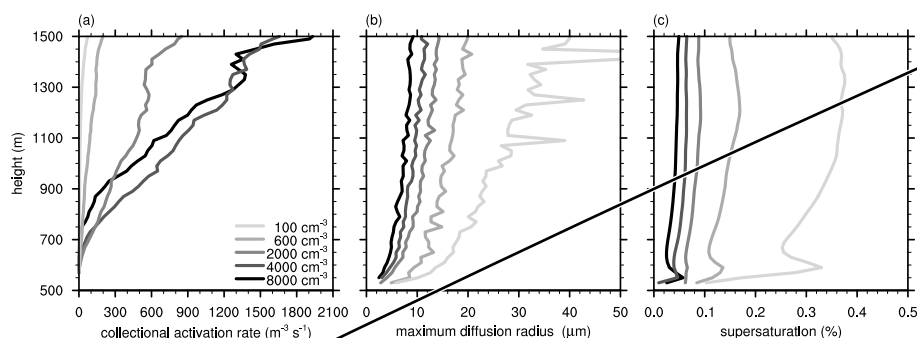

**Figure 4.** Vertical profiles of the collectional activation rate (a), the maximum diffusion radius (b), and the supersaturation (c) for the analyzed aerosol concentrations (line brightness).

activation; second, the coalescence of an inactivated aerosol with an activated aerosol resulting in an inactivated aerosol, which activates **after some diffusional growth**. If the latter process results directly in an activated aerosol, this collection is only considered a collectional activation if the wet radius of initially activated particle is smaller than the critical radius of the newly formed activated particle. The latter restriction ensures that the coalescence of both particles is necessary to aggregate the required amount of water for activation and excludes scavenging by large activated particles collecting smaller ones while precipitating. Note that only collections of the first type are able to increase the number of activated aerosols, while the second type might have no or a negative impact on the total number of activated aerosols as discussed in Section 2.

To exemplify this methodology, Fig. 3 shows, for an aerosol selected from the LCM simulations discussed below, the time series of its radius and critical radius (panel a) and the ambient supersaturation and critical supersaturation (panel b). Note that this aerosol is actually one super-droplet, representing a larger ensemble of identical aerosols, which is, however, interpreted as one aerosol here. The initial dry radius of the aerosol is  $0.27\ \mu\text{m}$ . On its way to activation, the particle experiences diffusional growth, which can be easily identified by the continuous change of radius. One collection event, characterized by a distinct increase in radius, is visible at 6220 s simulated time. At this point in time, the inactivated aerosol (wet radius  $3.1\ \mu\text{m}$ ) coalesces with an activated particle (wet radius  $7.8\ \mu\text{m}$ , aerosol dry radius  $0.13\ \mu\text{m}$ ), but the product of coalescence (wet radius  $7.9\ \mu\text{m}$ , aerosol dry radius  $0.28\ \mu\text{m}$ ) remains inactivated. Due to the increased amount of aerosol mass, the critical radius (and to a lesser extent the critical supersaturation) increases (decreases) after the coalescence. Afterwards, the particle grows by diffusion and exceeds the critical radius at 6253 s simulated time, which can be identified as the time of activation. All in all, this activation is considered a collectional activation since  $dm|_{\text{coll}} = 1.9 \times 10^{-12}\ \text{kg} > dm|_{\text{diff}} = 6.2 \times 10^{-13}\ \text{kg}$ .

## 5 Results

The last section showed that collection can contribute significantly to the mass growth leading to the activation of a single aerosol. But how does collection contribute to the activation of aerosols in general? Figure 4 shows the vertical profiles of (a) the collectional activation rate, i.e., the number of aerosols activated by collection per unit volume and unit time, (b) the

|                                                                                  |                                              |
|----------------------------------------------------------------------------------|----------------------------------------------|
|  | Author: reviewer    Date: 2017/04/14 0:10:37 |
|                                                                                  | 13. Minor request.<br>Same as above          |
|  | Author: reviewer    Date: 2017/04/14 0:10:47 |
|                                                                                  | 14. Typo                                     |
|  | Author: reviewer    Date: 2017/04/14 0:11:04 |
|                                                                                  | 15. Typo                                     |

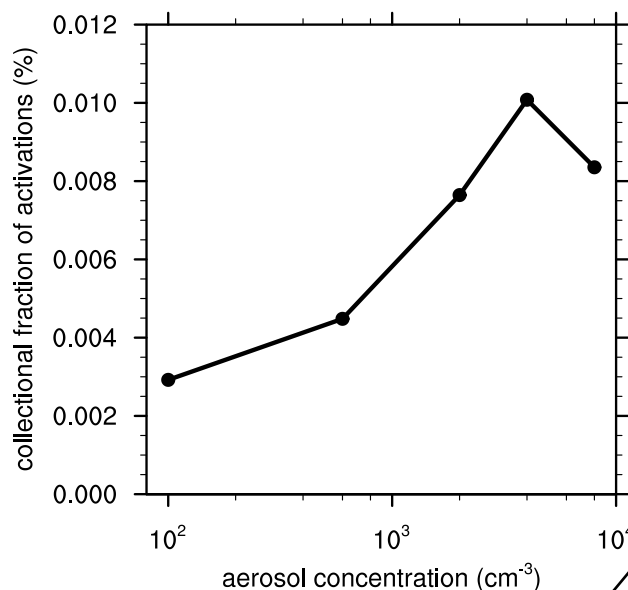

**Figure 5.** The collectional fraction of all activations as a function of the aerosol concentration

159 maximum diffusion radius, i.e., the maximum critical radius of aerosols exclusively activated by diffusion at a certain height,  
 160 and (c) the supersaturation. Profiles (a) and (c) are conditionally averaged over all supersaturated grid cells. Only data of the  
 161 last 4 simulated hours is considered. Values above the average cloud top height (at 1500 m) are not displayed due to insufficient  
 162 statistics.

163 The maximum diffusion radius (Fig. 4 b) increases (neglecting outliers) monotonically with height reaching maxima between  
 164 40  $\mu\text{m}$  and 9  $\mu\text{m}$  for aerosol concentrations of 100  $\text{cm}^{-3}$  to 8000  $\text{cm}^{-3}$ , respectively. The supersaturation (Fig. 4 c) exhibits  
 165 a distinct peak at the cloud base and relaxes toward its equilibrium value determined by the number of activated aerosols  
 166 and vertical velocity above (e.g., Rogers and Yau, 1989, Chap. 7). Due to the larger number of water vapor absorbers, the  
 167 supersaturation as well as the maximum diffusion radius are generally smaller in the more aerosol-laden simulations.

168 The collectional activation rate (Fig. 4 a) increases almost linearly with height. This increase can be related to the longer  
 169 lasting diffusional growth resulting in potentially larger particles at higher levels, which increases the collection kernel and  
 170 therefore the collection probability. The slope is larger in aerosol-laden environments, where more aerosols are available  
 171 for activation. Additionally, the height above cloud base where the collectional activation starts increases with the aerosol  
 172 concentration since the average particle radius is too small to enable collisions at lower levels. Accordingly, the collectional  
 173 activation rate in the 8000  $\text{cm}^{-3}$  simulation exhibits smaller to similar values than in the 4000  $\text{cm}^{-3}$  simulation although the  
 174 slope in the 8000  $\text{cm}^{-3}$  simulation is larger. Note that the general shape of the collectional activation rate differs significantly  
 175 from the typical profile of diffusional activation, which exhibits as a distinct peak at cloud base where the majority of aerosols  
 176 activates by diffusion (not shown, see, e.g., Slawinska et al., 2012; Hoffmann et al., 2015).

 Author: reviewer    Date: 2017/04/14 0:11:17

16. Minor suggestion.

Do diffusional activations also occur at high altitude? If so, wouldn't it be informative for readers to show also the vertical profile of the diffusional activation?



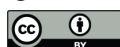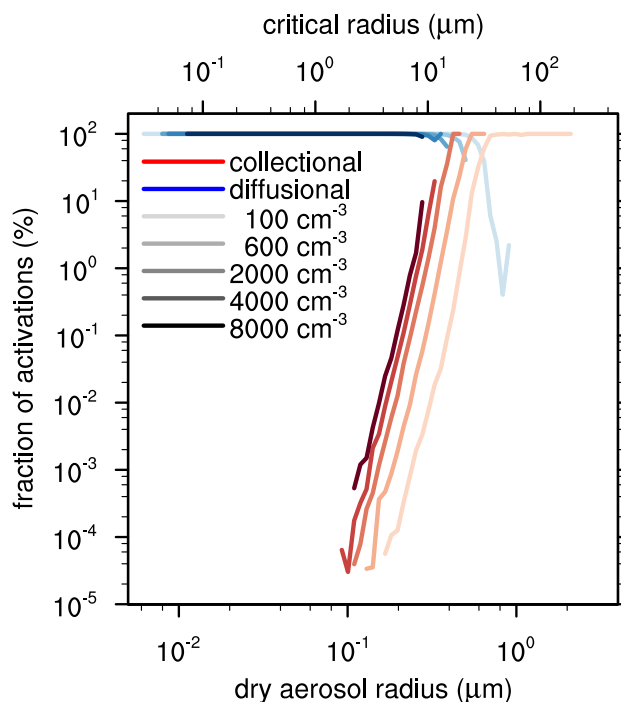

**Figure 6.** The collectional (red lines) and diffusional (blue lines) fraction of activations as a function of the dry aerosol radius (lower abscissa) and critical radius (at cloud base temperature of 294.5 K, upper abscissa) for the analyzed aerosol concentrations (line brightness).

Generally, the contribution of collectional activation to the number of activated aerosols is significantly smaller than the contribution of diffusional activation (Fig. 5): only 1 activation in 10000 to 35000 is caused by collection, with a greater contribution of collectional activation in moderately aerosol-laden environments up to  $4000\text{ cm}^{-3}$ . As it will be outlined below, this increase can be attributed to a shift of collectional activation to smaller, but more numerous aerosols. For  $8000\text{ cm}^{-3}$ , however, the fraction decreases again since the particles are too small to trigger a larger amount of collisions.

Figure 6 shows the collectional and diffusional fraction of activations as a function of the dry aerosol radius on the lower abscissa and the corresponding critical radius (calculated for the cloud base temperature of approximately 294.5 K) on the upper abscissa. As expected, diffusional activation is the dominant process for small aerosols (dry radius  $< 0.1\text{ }\mu\text{m}$ ) as long as the dry aerosol radius is not too small and the corresponding critical supersaturation not too high to inhibit activation. Accordingly, the left boundary of diffusional activation is shifted toward larger radii as the maximum supersaturations decrease in more aerosol-laden environments (see Fig. 4 c). For aerosols larger than  $0.1\text{ }\mu\text{m}$ , collectional activation becomes increasingly important affecting aerosols in the range of  $0.16 - 2.5\text{ }\mu\text{m}$ ,  $0.13 - 0.65\text{ }\mu\text{m}$ ,  $0.11 - 0.46\text{ }\mu\text{m}$ ,  $0.092 - 0.33\text{ }\mu\text{m}$ ,  $0.11 - 0.28\text{ }\mu\text{m}$  for aerosol concentrations of 100, 600, 2000, 4000, and  $8000\text{ cm}^{-3}$ , respectively. **Larger aerosols do not activate at all.**

The collectional fraction of activations increases following a power-law relation toward larger radii, reflecting the higher collision probability of larger particles. The collectional fraction reaches up to 100 % for the 100, 600, and  $2000\text{ cm}^{-3}$  simula-

 Author: reviewer    Date: 2017/04/13 23:54:14

17. Major question.

This is not trivial. Do you have any clear explanation why this does not happen? Is this just caused by the lack of aerosol particles of this size or is there any other mechanism to inhibit both diffusional and collectional activation?

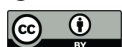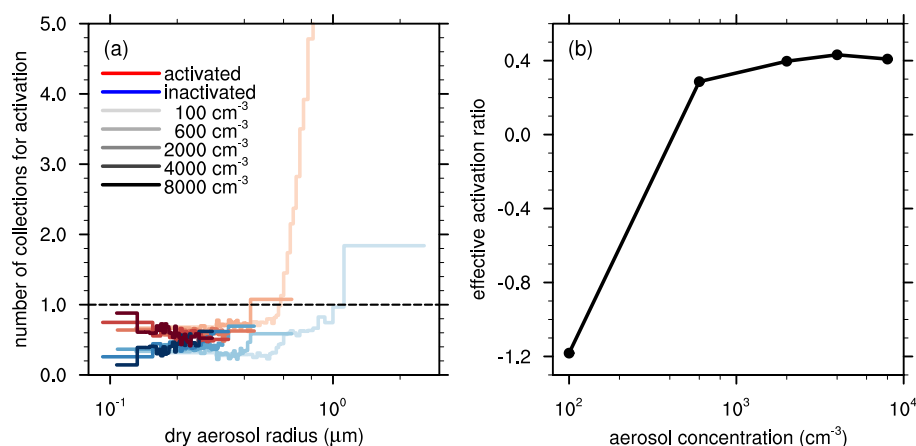

**Figure 7.** Panel (a) displays the number of collected activated (red lines) and inactivated aerosols (blue lines) necessary to cause collectional activation as a function of the dry aerosol radius for the analyzed aerosol concentrations (brightness). The data has been binned; each bin contains at least 3 % of all registered collectional activations. Panel (b) shows the effective activation ratio (i.e., the net increase in the number of newly activated aerosols per collectional activation) as a function of aerosol concentration.

tions at about 0.83, 0.54, and 0.42  $\mu\text{m}$  dry aerosol radius, respectively, indicating a significant effect of collectional activation on this part of the aerosol spectrum. For higher aerosol concentrations, collectional activation does not dominate, but still contributes noteworthy with fractions up to 20 % and 10 % for aerosol concentrations of 4000 and 8000  $\text{cm}^{-3}$ , respectively. The dry aerosol radius at which activation reaches 100 % can be clearly assigned to the maximum radii that can be produced by diffusion. To create any larger particles, existing particles need to be merged. Accordingly, to activate aerosols with a larger critical radius, collection must be inherently involved. For the 100  $\text{cm}^{-3}$  simulation, the largest radii produced by diffusion are about 40  $\mu\text{m}$  (neglecting the outliers in Fig. 4 b), corresponding to a dry aerosol radius of 0.76  $\mu\text{m}$ , which is close to the dry aerosols exhibiting a 100 % collectional fraction of activations. A similar agreement can be found for the simulations initialized with aerosol concentrations of 600 and 2000  $\text{cm}^{-3}$ .

In general, the range of aerosols affected by collectional activation shifts toward smaller radii as the aerosols concentration increases. This is primarily a result of the decreasing maximum radii that can be reached by diffusion alone (Fig. 4 b). Additionally, the supersaturation decreases too (Fig. 4 c), which decelerates diffusional activation and therefore favors collectional activation. Since small aerosols are significantly more abundant than larger ones (Fig. 2), the number of aerosols that are potentially activated by collection increases as a result of this shift, resulting in the larger collectional fraction of all activations shown in Fig. 5.

In Section 2, it has been argued that the collection of particles with a large fraction of liquid water (and accordingly less aerosol) are more beneficial to collectional activation than particles with a large amount of aerosol mass. Figure 7 a displays the average number of collisions that take place during a collectional activation, separated into collected activated and collected inactivated particles. Accordingly, their sum yields the total number of collected particles necessary for a collectional activation.

This page contains no comments

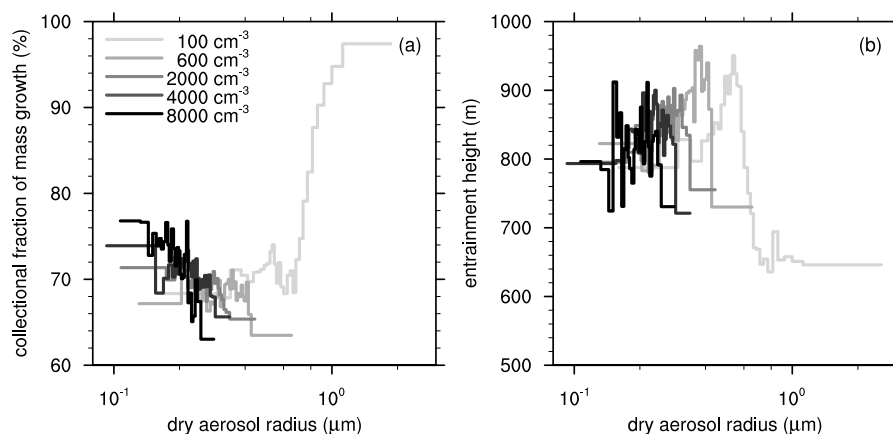

**Figure 8.** Collectional fraction of (a) the mass growth leading to collectional activation, and (b) the average entrainment height as a function of the dry aerosol radius for the analyzed aerosol concentrations (brightness). The data has been binned, each bin contains at least 3 % of all registered collectional activations.

For dry aerosol radii up to 0.3 – 0.5 μm (depending on aerosol concentration), only one collection (activated plus inactivated) is necessary to cause activation, while for larger aerosols more collections are needed. For the aerosols activated by only one collision, about 40 % of all events involve two inactivated aerosols and 60 % an inactivated as well as one activated aerosol, indicating the beneficial effect of highly dilute solution droplets to collectional activation as discussed above.

Accordingly, a substantial number of activated aerosols are annihilated during collectional activation. To quantify the influence of collectional activation on the number of activated aerosols, the *effective activation ratio* is defined: the net increase in the number of newly activated aerosols per collectional activation. Figure 7 b displays the effective activation ratio calculated from all registered collectional activations. For an aerosol concentration of 100 cm<sup>-3</sup>, where a large portion of aerosols needs multiple collections for activations, the effective activation ratio is –1.2, i.e., more activated aerosols are annihilated than produced. But already for an aerosol concentration of 600 cm<sup>-3</sup> and more, the effective activation ratio becomes positive and is approximately constant at 0.4, indicating that per collectional activation an average number of 0.4 new activated aerosols are produced. This ratio has to be considered in the interpretation of Fig. 5, indicating that the net effect of collectional activation is actually smaller (or even negative).

Although activation is dominated by collectional mass growth for larger aerosols, the growth by diffusion is still essential to create sufficiently large particles to trigger collisions. Figure 8 a depicts the collectional fraction of mass growth needed to grow beyond the critical mass for activation (for aerosols activated by collection). Note that the diffusional fraction of mass growth is the remaining fraction. For the smallest affected aerosols (~ 0.1 μm), the collectional fraction of mass growth is about 75 % and decreases slightly to 65 % for aerosols of ~ 0.4 μm, indicating that a large contribution of diffusional growth is necessary to produce sufficient large particles that are able to collide. The slight decrease toward larger radii is in agreement with the decrease in the number of activated aerosols collected during the activation process (Fig. 7 a): collection is only possible for

---

 Author: reviewer Date: 2017/04/14 0:11:31

18. Minor question.

If red is 0.8 and blue is 0.2, and 100 collectional activations occur, I understand that 80 activated and 20 inactivated aerosols are involved in these 100 collectional activation events. Is this correct?

If so, in Fig.7, red is always larger than blue, but this is puzzling.

At the section starting from L.135, it is declared that the following two processes are considered a collectional activation:

inact + inact -> act

inact + act -> act

It means, the number of activated aerosols involved in collectional activations must be always smaller than the number of inactivated aerosols involved.

However, this is not the case in Fig.7.

Please make this point clear.

Maybe just the legend is opposite? That is, red is inactivated and blue is activated? or maybe you count

inact + inact -> act

as blue and

inact + act -> act

as red?

---

 Author: reviewer Date: 2017/04/14 0:11:42

19. Minor question.

Same question as above. How do you calculate the red and blue line for this case?



the smallest aerosols if they encounter a substantially larger activated particle, which results in a larger collectional fraction of mass growth and a larger number of collected activated aerosols. For aerosols larger than  $1\text{ }\mu\text{m}$ , the collectional fraction increases rapidly to 97 %, which can be attributed to the large critical radii which can be only exceeded by the collection of multiple droplets.

Figure 8 b displays the mean entrainment height of the particles involved in each collectional activation. Despite the largest particles ( $> 0.6\text{ }\mu\text{m}$ ) in the most pristine case ( $100\text{ cm}^{-3}$ ), all collectional activations involve particles that have entered the cloud well above the cloud base, which is located at  $500 - 600\text{ m}$ . Accordingly, these particles miss the typical supersaturation maximum located at cloud base (see Fig. 4 c), where a majority of these aerosols normally activates. Indeed, entrainment above cloud base is generally favorable for collectional activation since these aerosols are mixed into an environment where larger particles exist, triggering collisions among them more easily. For aerosols larger than  $0.6\text{ }\mu\text{m}$ , the average entrainment height is located closer to the cloud base. Since multiple collections are necessary for their activation (see Fig. 7 a), the lower average entrainment height is more representative for the average entrainment height of all particles inside the cloud, which is the cloud base (e.g., Hoffmann et al., 2015).

## 6 Summary and discussion

The influence of collision and coalescence on the activation of aerosols has been studied using theoretical arguments and large-eddy simulations (LES) with a coupled Lagrangian cloud model (LCM). The presented theory has shown that an unactivated aerosol can be activated by the collection of particles with a comparably small amount of aerosol mass (i.e., particles consisting almost entirely of water), while the collection of large amounts of additional aerosol mass inhibits activation or even causes the deactivation of previously activated aerosols. The LCM simulations of shallow trade wind cumuli indicated that collectional activation becomes possible for aerosols larger than approximately  $0.1\text{ }\mu\text{m}$  in dry radius, and its contribution increases with a power-law relation toward larger aerosols. In pristine conditions, collection is the only process for the activation of aerosols larger than  $0.83\text{ }\mu\text{m}$  in dry radius at an aerosol concentration of  $100\text{ cm}^{-3}$ . This boundary is shifted to smaller radii in more polluted environments (down to  $0.42\text{ }\mu\text{m}$  at  $2000\text{ cm}^{-3}$ ). The highest contribution of collectional activation to the total number of activated aerosols is found at an aerosol concentration of  $4000\text{ cm}^{-3}$ , where 1 in 10000 activations is caused by collection. If the aerosol concentration becomes higher and hence the particles too small, collectional activation is inhibited and its contribution decreases again. Collectional activation frequently involves the collection of already activated aerosols reducing the net increase of newly activated aerosols per collectional activation to 0.4, while the remainder (0.6 activated aerosols) is annihilated during the activation process. Moreover, collectional activation affects predominantly particles that have been entrained above cloud base, i.e., activates aerosols that have not been able to activate by diffusion at cloud base, where the largest supersaturations occur. Finally, it has been shown that the collectional activation rate increases almost linear with height, while the slope and the height, from which collectional activation starts, increase with the aerosol concentration.

In conclusion, this study revealed collision and coalescence as an additional process for the activation of aerosols. This process is not covered by commonly applied activation parameterizations (e.g., Twomey, 1959). But does this matter? First

 Author: reviewer    Date: 2017/04/14 0:11:53

20. Minor request

It is difficult to follow the meaning of this sentence. In particular the last half. Do you mean "average entrainment height of all particles inside the cloud is the cloud base"? Please give a clear and detailed explanation.





of all, with a maximum of 1 in 10000 activations, collectional activation can be safely neglected. But one can also argue that collectional activation is already (but implicitly) covered by standard cloud models: Activation parameterizations usually activate aerosols as soon as the critical supersaturation is exceeded, i.e., they neglect kinetic effects inhibiting the immediate activation of large aerosols, which need a certain time to grow beyond their critical radius. As pointed out by Chuang et al. (1997), this might overestimate the number of activated aerosols (or cloud droplets) since a certain fraction of the larger aerosols is falsely treated as activated (or as cloud droplets). However, following the argumentation of Nenes et al. (2001), these particles might act, due to their large wet radii, as regular cloud droplets although they are not formally activated, and the estimated droplet number concentration is not influenced by this shortcoming of the activation parameterization. And indeed, this study showed that a certain fraction of these formally inactivated particles are able to collide and coalesce, i.e., act as regular cloud droplets. Similarly, in standard cloud models, these falsely activated cloud droplets will experience the model's representation of collision and coalescence that might ultimately result in an implicit realization of collectional activation.

Accordingly, collectional activation is not of particular importance for determining the number of cloud droplets, but it indicates clearly the limits of Köhler activation theory. Without ambiguity, diffusion-based Köhler theory is only applicable to aerosols smaller than  $0.1\ \mu\text{m}$  in dry radius, while an increasing fraction of aerosols activates by collection at larger radii. Ultimately, the activation of aerosols larger than about  $1.0\ \mu\text{m}$  is entirely caused by collection (if it takes place at all). Therefore, the range between approximately  $0.1\ \mu\text{m}$  and  $1.0\ \mu\text{m}$  should be considered as a transition zone between (i) typical aerosols that need to experience sufficiently strong supersaturations to grow beyond the critical radius and (ii) so-called giant and ultra-giant aerosols with sufficiently large wet radii to act like cloud droplets by triggering collision and coalescence without being formally activated (e.g., Johnson, 1982).

Finally, potential sources of uncertainty within this study shall be mentioned. First, the accuracy of the applied collection kernel is limited. The widely-used collision efficiencies of Hall (1980) for small particles ( $\lesssim 20\ \mu\text{m}$ ) are slightly higher than other estimates (e.g., Böhm, 1992). An effect of this uncertainty is the collectional activation of aerosols that are too small to collide physically. Accordingly, collectional activation shall affect slightly larger radii than evaluated here. Further note that additional simulations neglecting turbulence effects on the collection kernel (not shown) have exhibited a similar spectral distribution of collectional activation, but indicated a smaller contribution to the total number of activated aerosols. Second, the initialized aerosol distribution is always maritime, i.e., it includes a large fraction of large aerosols which are not part of continental air masses (e.g., Jaenicke, 1993) but are primarily affected by collectional activation as shown here. Accordingly, the collectional fraction of activations might be lower in environments which exhibit a smaller fraction of aerosols in the affected size range. Third, not all aerosols consist of (highly hygroscopic) sodium chloride although the size range affected by collectional activation is usually assumed to consist of sea salt (Jaenicke, 1993). Aerosols with a lower hygroscopicity would exhibit a smaller solution effect which is equivalent to a smaller dry radius of the sodium chloride aerosols examined here, i.e., the wet radius of these aerosols would be smaller and they would less likely cause collisions. Again, the range of aerosols affected by collectional activation would be shifted to larger radii.

This page contains no comments



## 297 Appendix A: The Lagrangian cloud model

298 In this section, the basic framework of the Lagrangian cloud model (LCM) applied in this study as well as the extensions  
 299 made to treat aerosol mass during collision and coalescence are described. One can refer to Riechermann et al. (2012) for the  
 300 original description, Hoffmann et al. (2015) for the consideration of aerosols during diffusional growth, and Hoffmann et al.  
 301 (2017, in review) for the most recent description of the LCM. This LCM, as all other available particle-based cloud physical  
 302 models (Andrejczuk et al., 2008; Shima et al., 2009; Sölch and Kärcher, 2010; Naumann and Seifert, 2015), are based on the  
 303 so-called *super-droplet* approach in which each simulated particle represents an ensemble of identical, real particles, growing  
 304 continuously from an aerosol to a cloud droplet. The number of particles within this ensemble, the so-called *weighting factor*,  
 305 is a unique feature of each particle, which is considered for a physical appropriate representation of cloud microphysics within  
 306 the super-droplet approach.

307 The transport of a simulated particle is described by

$$308 \quad \frac{dX_i}{dt} = u_i + \tilde{u}_i - \delta_{i3} w_s, \quad (\text{A1})$$

309 where  $X_i$  is the particle location and  $u_i$  is the LES resolved-scale velocity at the particle location determined from interpolating  
 310 linearly between the 8 adjacent grid points of the LES. A turbulent velocity component  $\tilde{u}_i$  is computed from a stochastic model  
 311 based on the LES sub-grid scale turbulence kinetic energy (Sölch and Kärcher, 2010). The sedimentation velocity  $w_s$  is given  
 312 by an empirical relationship (Rogers et al., 1993). Equation (A1) is solved using a first-order Euler method.

313 As described in Hoffmann et al. (2015), the diffusional growth of each simulated particle is calculated from

$$314 \quad r \frac{dr}{dt} = \frac{S - A/r + b \cdot m_s/r^3}{F_k + F_D} \cdot f(r, w_s), \quad (\text{A2})$$

315 where  $r$  is the particle's radius and  $S$  terms the supersaturation within the grid box, in which the particle is located. Curvature  
 316 and solution effects are considered by the the terms  $-A/r$  and  $b \cdot m_s/r^3$ , respectively. The factor  $f$  parameterizes the so-called  
 317 ventilation effect (Rogers and Yau, 1989). The coefficients  $F_k = (L_v/(R_v T) - 1) \cdot L_v \rho_l / (T k)$  and  $F_D = \rho_l R_v T / (D_v e_s)$  repre-  
 318 sent the effects of thermal conduction and diffusion of water vapor between the particle and the surrounding air, respectively.  
 319 Here,  $k$  is the coefficient of thermal conductivity in air,  $D_v$  is the molecular diffusivity of water vapor in air,  $L_v$  is the latent  
 320 heat of vaporization, and  $e_s$  is the saturation vapor pressure. Equation (A2) is solved using a fourth-order Rosenbrock method.

321 Collision and coalescence are calculated from a statistical approach in which collections are calculated from the particle size  
 322 distribution resulting from all super-droplets currently located within a grid box (Riechermann et al., 2012). These interactions  
 323 affect the weighting factor  $A_n$  (i.e., the number of all particles represented by one super-droplet), the total water mass of a super-  
 324 droplet  $M_n = A_n \cdot m_n$  (where  $m_n$  is the mass of one particle represented by super-droplet  $n$ ), and also the dry aerosol mass  
 325  $M_{s,n} = A_n \cdot m_{s,n}$  (where  $m_{s,n}$  is the dry aerosol mass of one particle represented by super-droplet  $n$ ), which has been introduced  
 326 for this study. The algorithm follows the *all-or-nothing* principle, which has been rigorously evaluated by Unterstrasser et al.  
 327 (2016, in review) and has been recently implemented into this LCM by Hoffmann et al. (2017, in review).

328 It is assumed that the super-droplet with the smaller weighting factor (index  $n$ ) collects  $A_n$  particles from the super-droplet  
 329 with the larger weighting factor (index  $m$ ), with commensurate changes in  $M_m$ ,  $M_n$ ,  $M_{s,m}$ , and  $M_{s,n}$ . Since the weighting

This page contains no comments

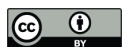

factor of the collecting super-droplet  $n$  does not change during this process, its wet radius

$$r_n = \left( \frac{M_n}{\frac{4}{3}\pi\rho_l A_n} \right)^{1/3} \quad (\text{A3})$$

and the dry aerosol radius

$$r_{s,n} = \left( \frac{M_{s,n}}{\frac{4}{3}\pi\rho_s A_n} \right)^{1/3} \quad (\text{A4})$$

increase. Additionally, same-size collections of the particles belonging to the same super-droplet are considered. These interactions do not change  $M_n$  and  $M_{s,n}$ , but they decrease  $A_n$  and accordingly increase  $r_n$  and  $r_{s,n}$ .

These two processes yield in the following description for the temporal change of  $A_n$  (assuming that the simulated particles are sorted such that  $A_n > A_{n+1}$ ):

$$\frac{dA_n}{dt}\delta t = -\frac{1}{2}(A_n - 1)P_{nn} - \sum_{m=n+1}^{N_p} A_m P_{mn}. \quad (\text{A5})$$

The first term on the right-hand-side denotes the loss of  $A_n$  due to same-size collections; the second term the loss of  $A_n$  due to collisions with particles of a smaller weighting factor. The total water mass and the total aerosol mass of a super-droplet change according to

$$\frac{dM_n}{dt}\delta t = \sum_{m=1}^{n-1} A_n m_m P_{nm} - \sum_{m=n+1}^{N_p} A_m m_n P_{mn}, \quad (\text{A6})$$

and

$$\frac{dM_{s,n}}{dt}\delta t = \sum_{m=1}^{n-1} A_n m_{s,m} P_{nm} - \sum_{m=n+1}^{N_p} A_m m_{s,n} P_{mn}, \quad (\text{A7})$$

respectively. In both equations, the first term on the right-hand-side denotes the increase of  $M_n$  or  $M_{s,n}$  by the collection of water or dry aerosol mass from super-droplets with a larger weighting factor, while the second term describes the loss of these quantities to super-droplets with a smaller weighting factor. The function  $P_{mn}$  controls if a collection takes place:

$$P_{mn} := P(\varphi_{mn}) = \begin{cases} 0 & \text{for } \varphi_{mn} \leq \xi, \\ 1 & \text{for } \varphi_{mn} > \xi, \end{cases} \quad (\text{A8})$$

where  $\xi$  is a random number uniformly chosen from the interval  $[0, 1]$  and

$$\varphi_{mn} = K(r_m, r_n, \epsilon) A_n \delta t / \Delta V \quad (\text{A9})$$

is the probability that a particle with the radius  $r_m$  collects one of  $A_n$  particles with the radius  $r_n$  within a volume  $\Delta V$  during the (collection) time step  $\delta t$ . The collection kernel  $K$  is calculated from the traditional collision efficiencies as given by Hall (1980), and includes turbulence effects by an enhancement factor for the collision efficiencies by Wang and Grabowski (2009)

This page contains no comments



354 and a parameterization of particle relative velocities and changes in the particle radial distribution based on Ayala et al. (2008).  
355 These turbulence effects on  $K$  are steered by the dissipation rate  $\epsilon$  calculated by the LES subgrid-scale model. The equations  
356 (A5) – (A7) are solved using a first-order Euler method.

357 *Acknowledgements.* The author thanks Siegfried Raasch and Katrin Scharf (both of the Leibniz Universität Hannover) for their helpful  
358 comments on the manuscript. This work has been funded by the German Research Foundation (DFG) under grant RA 617/27-1. Simulations  
359 have been carried out on the Cray XC-40 systems of the North-German Supercomputing Alliance (HLRN). The applied LES/LCM model is  
360 freely available (revision 1954, <http://palm.muk.uni-hannover.de/trac/browser/?rev=1954>). Additional software developed for the LES/LCM  
361 model as well as the analysis is available on request.

This page contains no comments





## 362 References

- 363 Albrecht, B. A.: Aerosols, cloud microphysics, and fractional cloudiness, *Science*, 245, 1227–1230, 1989.
- 364 Andrejczuk, M., Reisner, J. M., Henson, B., Dubey, M. K., and Jeffery, C. A.: The potential impacts of pollution on a nondrizzling stratus  
 365 deck: Does aerosol number matter more than type?, *J. Geophys. Res.*, 113, 2008.
- 366 Ayala, O., Rosa, B., and Wang, L.-P.: Effects of turbulence on the geometric collision rate of sedimenting droplets. Part 2. Theory and  
 367 parameterization, *New J. Phys.*, 10, 2008.
- 368 Böhm, J. P.: A general hydrodynamic theory for mixed-phase microphysics. Part II: collision kernels for coalescence, *Atmos. Res.*, 27, 275 –  
 369 290, doi:[http://dx.doi.org/10.1016/0169-8095\(92\)90036-A](http://dx.doi.org/10.1016/0169-8095(92)90036-A), <http://www.sciencedirect.com/science/article/pii/016980959290036A>, 1992.
- 370 Chlond, A.: Locally modified version of Bott's advection scheme, *Mon. Wea. Rev.*, 122, 111–125, 1994.
- 371 Chuang, P. Y., Charlson, R. J., and Seinfeld, J. H.: Kinetic limitations on droplet formation in clouds, *Nature*, 390, 594–596, <http://dx.doi.org/10.1038/37576>, 1997.
- 372
- 373 Devenish, B., Bartello, P., Brenguier, J.-L., Collins, L., Grabowski, W., IJzermans, R., Malinowski, S., Reeks, M., Vassilicos, J., Wang, L.-P.,  
 374 et al.: Droplet growth in warm turbulent clouds, *Quart. J. Roy. Meteor. Soc.*, 138, 1401–1429, 2012.
- 375 Grabowski, W. W. and Smolarkiewicz, P. K.: Monotone finite-difference approximations to the advection-condensation problem, *Mon. Wea.*  
 376 *Rev.*, 118, 2082–2098, 1990.
- 377 Hall, W. D.: A detailed microphysical model within a two-dimensional dynamic framework: Model description and preliminary results, *J.*  
 378 *Atmos. Sci.*, 37, 2486–2507, 1980.
- 379 Hoffmann, F.: The Effect of Spurious Cloud Edge Supersaturations in Lagrangian Cloud Models: An Analytical and Numerical Study, *Mon.*  
 380 *Wea. Rev.*, 144, 107–118, doi:10.1175/MWR-D-15-0234.1, 2016.
- 381 Hoffmann, F., Raasch, S., and Noh, Y.: Entrainment of aerosols and their activation in a shallow cumulus cloud studied with a coupled  
 382 LCM-LES approach, *Atmos. Res.*, 156, 43–57, 2015.
- 383 Hoffmann, F., Noh, Y., and Raasch, S.: The route to raindrop formation in a shallow cumulus cloud simulated by a Lagrangian cloud model,  
 384 *J. Atmos. Sci.*, 2017, in review.
- 385 Holland, J. Z. and Rasmusson, E. M.: Measurement of atmospheric mass, energy, and momentum budgets over a 500-kilometer square of  
 386 tropical ocean, *Mon. Wea. Rev.*, 101, 44–55, 1973.
- 387 Jaenicke, R.: *Tropospheric aerosols*, Academic Press, Inc, 1993.
- 388 Johnson, D. B.: The role of giant and ultragiant aerosol particles in warm rain initiation, *J. Atmos. Sci.*, 39, 448–460, 1982.
- 389 Khvorostyanov, V. I. and Curry, J. A.: Refinements to the Köhler's theory of aerosol equilibrium radii, size spectra, and droplet activation:  
 390 Effects of humidity and insoluble fraction, *J. Geophys. Res.*, 112, 2007.
- 391 Köhler, H.: The nucleus in and the growth of hygroscopic droplets, *Trans. Faraday Soc.*, 32, 1152–1161, 1936.
- 392 Maronga, B., Gryschka, M., Heinze, R., Hoffmann, F., Kanani-Sühring, F., Keck, M., Ketelsen, K., Letzel, M. O., Sühring, M., and Raasch,  
 393 S.: The Parallelized Large-Eddy Simulation Model (PALM) version 4.0 for atmospheric and oceanic flows: model formulation, recent  
 394 developments, and future perspectives, *Geosci. Model Dev.*, 8, 2515–2551, doi:10.5194/gmd-8-2515-2015, 2015.
- 395 Naumann, A. K. and Seifert, A.: A Lagrangian drop model to study warm rain microphysical processes in shallow cumulus, *J. Adv. Model.*  
 396 *Earth Syst.*, 7, 1136–1154, 2015.
- 397 Nenes, A., Ghan, S., Abdul-Razzak, H., Chuang, P. Y., and Seinfeld, J. H.: Kinetic limitations on cloud droplet formation and impact on  
 398 cloud albedo, *Tellus B*, 53, 133–149, 2001.

This page contains no comments



- 399 Riechermann, T., Noh, Y., and Raasch, S.: A new method for large-eddy simulations of clouds with Lagrangian droplets including the effects  
400 of turbulent collision, *New J. Phys.*, 14, 2012.
- 401 Rogers, R., Baumgardner, D., Ethier, S., Carter, D., and Ecklund, W.: Comparison of raindrop size distributions measured by radar wind  
402 profiler and by airplane, *J. Appl. Meteor.*, 32, 694–699, 1993.
- 403 Rogers, R. R. and Yau, M. K.: *A Short Course in Cloud Physics*, Pergamon Press, New York, 1989.
- 404 Shima, S.-I., Kusano, K., Kawano, A., Sugiyama, T., and Kawahara, S.: The super-droplet method for the numerical simulation of clouds and  
405 precipitation: A particle-based and probabilistic microphysics model coupled with a non-hydrostatic model, *Quart. J. Roy. Meteor. Soc.*,  
406 135, 1307–1320, 2009.
- 407 Siebesma, A. P., Bretherton, C. S., Brown, A. R., Chlond, A., Cuxart, J., Duynkerke, P. G., Jiang, H., Khairoutdinov, M., Lewellen, D.,  
408 Moeng, C.-H., Sanchez, E., Stevens, B., and Stevens, D. E.: A large eddy simulation intercomparison study of shallow cumulus convection,  
409 *J. Atmos. Sci.*, 60, 1201–1219, 2003.
- 410 Slawinska, J., Grabowski, W. W., Pawlowska, H., and Morrison, H.: Droplet activation and mixing in large-eddy simulation of a shallow  
411 cumulus field, *J. Atmos. Sci.*, 69, 444–462, 2012.
- 412 Sölch, I. and Kärcher, B.: A large-eddy model for cirrus clouds with explicit aerosol and ice microphysics and Lagrangian ice particle  
413 tracking, *Quart. J. Roy. Meteor. Soc.*, 136, 2074–2093, 2010.
- 414 Twomey, S.: The nuclei of natural cloud formation part II: The supersaturation in natural clouds and the variation of cloud droplet concen-  
415 tration, *Pure Appl. Geophys.*, 43, 243–249, 1959.
- 416 Twomey, S.: Pollution and the planetary albedo, *Atmos. Environ.*, 8, 1251–1256, 1974.
- 417 Unterstrasser, S., Hoffmann, F., and Lerch, M.: Collection/aggregation algorithms in Lagrangian cloud microphysical models: Rigorous  
418 evaluation in box model simulations, *Geosci. Model Dev. Discuss.*, 2016, in review.
- 419 Wang, L.-P. and Grabowski, W. W.: The role of air turbulence in warm rain initiation, *Atmos. Sci. Let.*, 10, 1–8, doi:10.1002/asl.210, 2009.

This page contains no comments
