# Supplementary material for: On the Limits of Köhler Activation Theory: How do Collision andCoalescence Affect the Activation of Aerosols?
Source: Copernicus journal article supplement (doi:10.5194/acp-2017-134), 2017-02-15
Supplement: Supplementary file [file acp-2017-134-RC2-supplement.zip]

After coalescence, we have 4 possibilities.

i)  $RH > RH_c$

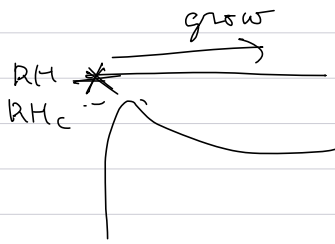

Irrespective to the resulting  $r$ , we can say that the particle is active (if the change of  $RH$  is slow)

ii)  $RH < RH_c$ ,  $r < r_n$

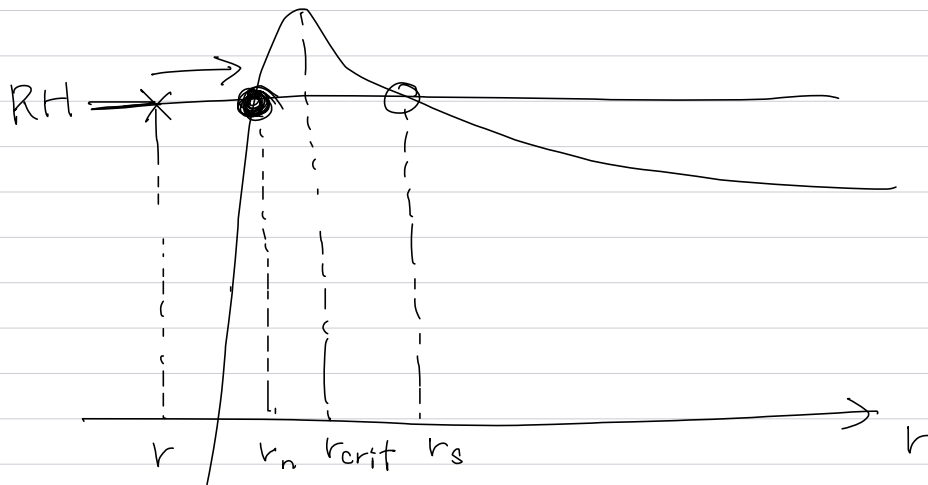

$r$  grows but stops at  $r_n$ , i.e. the new particle is inactive

iii)  $RH < RH_c$ ,  $r_n < r < r_s$

$r$  shrinks but stops at  $r_n$ , i.e. inactive.

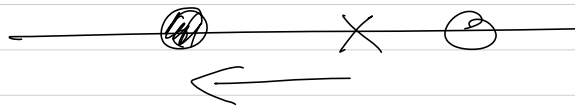

iv)  $RH < RH_c$ ,  $r_s < r$

$r$  grows, i.e. active.

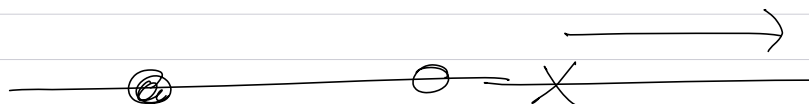

So,  $r > r_c$  is not an accurate criteria.
